# Supplementary material
Source: Research Square preprint supplement (doi:10.21203/rs.3.rs-9498017/v1)
Supplement: Supplementary file 1 [file 27360722bd59fc3a95c69de9.xlsx]

## Sheet: HUB
Top 10 in network string_interactions_0.4.tsv ranked by MCC method
Rank	Name	Score
1	PTPRC	15167
2	CD4	12851
3	JUN	10398
4	CCR2	10112
5	TIMP1	8205
6	AGT	7502
7	TLR2	6732
8	FLT1	5899
9	SPP1	5852
10	CYBB	5517
