# Supplementary material
Source: Research Square preprint supplement (doi:10.21203/rs.3.rs-9498017/v1)
Supplement: Supplementary file 2 [file 3bba168fcb39d496c8a09462.xlsx]

## Sheet: qPCR Primers
qPCR Primers
Gene Symbol	Forward Primer (5'→3')	Reverse Primer (5'→3')
ADAM15	GGCACATTTGCTGCCTCGATTG	TCACACCTCCTGAGAAGTCAGG
BCL2	ATCGCCCTGTGGATGACTGAGT	GCCAGGAGAAATCAAACAGAGGC
MCL1	AAGGACAAAACGGGACTGG	ATATGCCAAACCAGCTCCTAC
BCL1L1	GCCACTTACCTGAATGACCACC	AACCAGCGGTTGAAGCGTTCCT
BID	ATTAACCAGAACCTACGCACC	TCTAGGAACGCTGTTGACATG
BAD	AGGATGAGTGACGAGTTTGTG	GGTGGAGTTTCGGGATGTG
BCL2L11	CAAGAGTTGCGGCGTATTGGAG	ACACCAGGCGGACAATGTAACG
PMAIP1	ACCAAGCCGTGACCAAG	CATTGTGTAGCACCTCCCAG
BAX	TCAGGATGCGTCCACCAAGAAG	TGTGTCCACGGCGGCAATCATC
BAK1	CACCTTACCTCTGCAACCTAG	TGATGCCACTCTCAAACAGG

## Sheet: pepitide
Peptide sequence of BH3-only proteins
Peptide	Sequence
hBIM	Ac-MRPEIWIAQELRRIGDEFNA-NH2	Fraser C, Methods Mol Biol, 2019
hBID-Y	Ac-EDIIRNIARHLAQVGDSMDRY-NH2	Fraser C, Methods Mol Biol, 2019
mBAD	Ac-LWAAQRYGRELRRMSDEFEGSFKGL-NH2	Fraser C, Methods Mol Biol, 2019
mNoxaA	Ac-AELPPEFAAQLRKIGDKVYC-NH2	Fraser C, Methods Mol Biol, 2019
MS-1	Ac-RPEIWMTQGLRRLGDEINAYYAR-NH2	Fraser C, Methods Mol Biol, 2019
Puma	Ac-EQWAREIGAQLRRMADDLNA-NH2	Fraser C, Methods Mol Biol, 2019
W-Hrk	Ac-WSSAAQLTAARLKALGDELHQ-NH2	Fraser C, Methods Mol Biol, 2019

## Sheet: shRNA
siRNA Sequences
Sequence Name		Sequence (5'→3')
shADAM15 #1	Target Sequence	GCTGGTGACTGGTACTTCATT
	Sense Oligo	CCGG-GCTGGTGACTGGTACTTCATT-CTCGAG-AATGAAGTACCAGTCACCAGC-TTTTTG
	Antisense Oligo	AATTCAAAAA-GCTGGTGACTGGTACTTCATT-CTCGAG-AATGAAGTACCAGTCACCAGC
shADAM15 #2	Target Sequence	CCCATTATTTCGCGAATCCAA
	Sense Oligo	CCGG-CCCATTATTTCGCGAATCCAA-CTCGAG-TTGGATTCGCGAAATAATGGG-TTTTTG
	Antisense Oligo	AATTCAAAAA-CCCATTATTTCGCGAATCCAA-CTCGAG-TTGGATTCGCGAAATAATGGG
shCtrl	Target Sequence	TTCTCCGAACGTGTCACGT
	Sense Oligo	CCGG-TTCTCCGAACGTGTCACGT-CTCGAG-ACGTGACACGTTCGGAGAA-TTTTTG
	Antisense Oligo	AATTCAAAAA-TTCTCCGAACGTGTCACGT-CTCGAG-ACGTGACACGTTCGGAGAA

## Sheet: Sheet1
Antibody	Host	Species reactivity	Clone/Type	Conjugation Type	Vendor	Catalog #	Application	Dilution
Primary antibody
ADAM15 Antibody	Mouse	Human	D-5	-	Santa Cruz	sc-365752	IF/WB(IP)	1:50/1:500
HCK Rabbit pAb	Rabbit	Human	pAb	-	Abclonal	A2083	IF	1:100
ADAM15 Polyclonal Antibody	Goat	Human	pAb	-	Thermo Fisher Scientific	PA5-47966	IP/IHC	25 µg/ml/15 µg/mL
Hck (E1I7F) Rabbit Monoclonal Antibody	Rabbit	Human	E1I7F	-	Cell Signaling Technology	14643	IP/WB	25 µg/mL/1:1000
goat IgG isotype control	Goat	-	pAb	-	Abcam	ab37373	IP	25 µg/mL
Rabbit IgG control Polyclonal antibody	Rabbit	-	pAb	-	Proteintech	30000-0-AP	IP	25 µg/mL
HCK Antibody	Mouse	Human	G-4	-	Santa Cruz	sc-166463	WB(IP)	1:500
anti-human CD45 Antibody	Mouse	Human	2D1	PerCP/Cy5.5	BioLegend	368504	F	01:50:00
anti-mouse CD45 Antibody	Rat	Mouse	30-F11	PE	BioLegend	103106	F	1:200
Pro-Apoptosis Bcl-2 Family Antibody Sampler Kit	Rabbit	Human	-	-	Cell Signaling Technology	9942	WB	1:1000
Anti-Phospho-AKT (Ser473) Rabbit mAb	Rabbit	Human	81M88K84	-	Epizyme	R011470	WB	1:1000
Anti-Phospho-FOXO3A (Ser253) Rabbit mAb	Rabbit	Human	42K60K09	-	Epizyme	R010946	WB	1:1000
Anti-FOXO3A Rabbit mAb	Rabbit	Human	76K53R97	-	Epizyme	R014090	WB	1:1000
Anti-FOXO1 Rabbit mAb	Rabbit	Human	91C34J78	-	Epizyme	R015231	WB	1:1000
Anti-Phospho-GSK3 beta (Ser9) Rabbit mAb	Rabbit	Human	51C27D91	-	Epizyme	R014114	WB	1:1000
Anti-Lamin B1 Rabbit mAb	Rabbit	Human	54I84Q27	-	Epizyme	R014250	WB	1:1000
Phospho-LYN (Y397)/LCK (Y394)/HCK (Y411)/BLK (Y389) Recombinant Rabbit Monoclonal Antibody	Rabbit	Human	PSH09-43	-	HUABIO	HA723105	WB	1:1000
Phospho-Akt (Thr308) Rabbit Monoclonal Antibody	Rabbit	Human	D25E6	-	Cell Signaling Technology	13038	WB	1:1000
Phospho-FoxO1 (Thr24)/FoxO3a (Thr32) Antibody	Rabbit	Human	pAb	-	Cell Signaling Technology	9464	WB	1:1000
Phospho-PDPK1 (Ser241) Antibody	Rabbit	Human	pAb	-	Affinity Biosciences	AF3018	WB	1:1000
pan-AKT1/2/3 Antibody	Rabbit	Human	pAb	-	Affinity Biosciences	AF6259	WB	1:1000
Anti-Beta Actin/ACTB Antibody	Rabbit	Human	BF-1	-	Boster	BM3873	WB	1:10000
Anti-GAPDH Antibody	Mouse	Human	5A12	-	Boster	BM1623	WB	1:10000
Secondary antibody
anti-mouse IgG	Goat	Mouse	-	Alexa Fluor 488	Cell Signaling Technology	4408	IF	1:1000
anti-rabbit IgG	Goat	Rabbit	-	Alexa Fluor 647	Cell Signaling Technology	4414	IF	1:1000
Anti-Mouse IgG(H+L)	Goat	Mouse	-	HRP	Proteintech	SA00001-1	WB	1:5000
Anti-Rabbit IgG(H+L)	Goat	Rabbit	-	HRP	Proteintech	SA00001-2	WB	1:5000
