# Supplementary material
Source: Research Square preprint supplement (doi:10.21203/rs.3.rs-9498017/v1)
Supplement: Supplementary file 3 [file 484ae95a9d539ef657278635.xlsx]

## Sheet: Summary
Basic information of specimen								VEN-based Treatment Outcome Evaluation													Diagnostic Laboratory And Molecular Profile At Specimen Collection
Patient ID	Sample ID	Specimen Type	Race	Sex	Age At Diagnosis	Age At Specimen Collection	FAB Classification	Specimen Groups	Disease Stage At Specimen Collection	Prior Therapy	VEN-based Treatment Regimens	VEN-induced CR/CRi Time	VEN-induced CR/CRi Duration	First Post-treatment % Blasts in BM	First Post-treatment % MRD Status (Flow)	First Post-treatment Abnormal AML Fusions	Abnormal AML Fusions At Relapse	% Blasts In BM At Relapse	MRD Status (Flow) At Relapse	Subsequent Therapies Post-VEN	Consensus AML Fusions	Karyotype	Platelet Count(*10^9/L)	WBC Count(*10^9/L)	% Blasts In BM	% Blasts In PB	LDH(U/L)	FLT3-ITD	CEBPA	NPM1	RUNX1	ASXL1	TP53	Variant Summary
X01	3742M	BM	Asian	F	77	77	M4	Remission	De novo	-	AZA+VEN+CHI	38	220	2	Negative	ND	-	-	-	Lost to follow-up	Negative	46,XX	242	3.21	48	12	219	Negative	Negative	Negative	Negative	Negative	Negative	BCOR|DNMT3A|EZH2|IDH2
X02	8915M	BM	Asian	M	39	39	M2	Remission	De novo	-	HHT＋Ara-C＋ACR+VEN	31	107	1.5	Negative	ND	-	-	-	HSCT	Negative	46,XY,15pstk+[20]	66	48.7	56	78	1564	Negative	Negative	Positive	Negative	Negative	Negative	DNMT3A|FLT3|IDH1|NRAS
X03	2037M	BM	Asian	M	58	58	M4	Remission	De novo	-	AZA+VEN+CHI	11	153	3	Negative	ND	-	-	-	HSCT	Negative	46,XY	162	48.6	68	41	1207	Positive	Negative	Positive	Negative	Negative	Negative	DNMT3A|FLT3
X04	5681M	BM	Asian	F	73	73	M2	Remission	De novo	-	AZA+VEN+POSA	102	213	30	29.89	ND	-	-	-	Relapse	Negative	46,XX,der(7),inc[10]/46,XX[11]	57	1.89	65	60	227	Negative	Negative	Negative	Negative	Negative	Negative	DNMT3A|EZH2|IDH2
X05	7264M	BM	Asian	F	58	58	M2	Remission	De novo	-	AZA+VEN+CHI	11	116	3.5	Negative	ND	-	-	-	Lost to follow-up	Negative	47,XX,+8[1]/48,XX,+8,+8[17]/46,XX[2]	28	2.1	72.5	43	118	Negative	Negative	Negative	Negative	Positive	Negative	IDH1/PTPN11/TET2/WT1
X06	4359M	BM	Asian	F	57	57	M5	Remission	De novo	-	AZA+VEN+CHI	33	176	4.5	Negative	ND	-	-	-	Relapse	Negative	46,XX	95	230.1	92	90	832	Positive	Negative	Positive	Negative	Negative	Negative	Negative
X07	9872M	BM	Asian	M	63	63	M2	Refractory/Relapsed	De novo	-	AZA+VEN+CHI	41	-	66	67.58	ND	-	-	-	FLT3-targeted therapy	Negative	46,XY	175	13.06	83	81	511	Positive	Negative	Negative	Negative	Negative	Negative	FLT3-TKD
X08	1503M	BM	Asian	M	73	73	M2	Refractory/Relapsed	De novo	-	AZA+VEN|Thal+RIF+CHI|AZA+VEN+CHI+UCB-MT	200	-	4	0.32	ND	-	21	18.9	XPO-1 Inhibitor+RIF+CHI	Negative	46,XY[18]/44,XY,del(9q),-19,-22[2]	57	25.37	40	15	245	Negative	Positive	Negative	Positive	Positive	Negative	EZH2|NRAS|TET2
X09	6198M	BM	Asian	F	30	30	M1	Refractory/Relapsed	De novo	-	AZA+VEN|DNR+Ara-C+VEN	81	-	58	65.17	ND	-	-	-	DEC+CHI|HSCT	MLL(KMT2A)	46,XX,del(9p),t(11;12)(q23;q13)[9]/47,XX,del(9p),t(11;12)(q23;q13),+21[2]	7	63.2	85	96	363	Negative	Negative	Negative	Negative	Negative	Negative	NOTCH3
X10	2846M	BM	Asian	F	39	41	M2	Refractory/Relapsed	Relapse(DA)	DNR+Ara-C	AZA+VEN+CHI	36	-	10	7.25	AML1-ETO：298.821%	-	-	-	Ara-C+MIT	AML1-ETO	45,X,-X,t(8;21)(q22;q22)	47	2.66	53	15	153	Negative	Negative	Negative	Negative	Negative	Negative	Negative
X04	7930P	PB	Asian	F	73	74	M2	Refractory/Relapsed	Relapse(VEN)	AZA+VEN+POSA	AZA+VEN+POSA	102	213	30	29.89	ND	-	32	26.24	HHT+Ara-C	Negative	46,XX,der(7),inc[10]/46,XX[11]	21	2.39	32	4	207	Negative	Negative	Negative	Negative	Negative	Negative	DNMT3A|EZH2|IDH2
X11	3075M	BM	Asian	M	67	68	M2	Refractory/Relapsed	Relapse(VEN)	DEC+ACR+Ara-C|DEC+Ara-C+MIT|AZA+VEN+VORI	AZA+VEN+VORI	39	150	ND	ND	ND	-	7	6.69	CDK Inhibitor	Negative	46,XY	104	6.61	7	1	141.2	Negative	Positive	Negative	Negative	Positive	Negative	SRSF2 |STAG2 |TET2
X06	4821M	BM	Asian	F	57	58	M5	Refractory/Relapsed	Relapse(VEN)	AZA+VEN+CHI	AZA+VEN+CHI	33	176	4.5	Negative	ND	-	6	2.41	FLT3-targeted therapy	Negative	46,XX	202	6.63	6	0	178	Positive	Negative	Positive	Negative	Negative	Negative	Negative
Abbreviations: BM, bone marrow; PB, peripheral blood; FAB, French-American-British classification; VEN, venetoclax; AZA, azacitidine; CHI, chidamide; POSA, posaconazole; VORI, voriconazole; HHT, homoharringtonine; Ara-C, cytarabine; ACR, aclarubicin; DNR, daunorubicin; DEC, decitabine; MIT, mitoxantrone; Thal, thalidomide; RIF, Realgar-Indigo naturalis formula; UCB-MT, umbilical cord blood microt…

## Sheet: Data Dictionary
Clinical Summary Field	Definition	Values	Notes
Patient ID	Unique patient identifier		De-identified study ID
Sample ID	Unique specimen identifier		M=BM, P=PB; suffix indicates specimen type
Specimen Type	Type of biological specimen collected	BM, PB	BM=bone marrow aspirate; PB=peripheral blood
Race	Self-reported race/ethnicity		All patients from Asian population
Sex	Biological sex	M, F	M=male; F=female
Age At Diagnosis	Patient age at AML diagnosis (years)		Remission group mean ± SD: 60.3 ± 13.5; Refractory/Relapsed mean ± SD: 57.4 ± 16.8; Mann-Whitney U test: U = 23.0, p = 0.829
Age At Specimen Collection	Patient age at specimen collection (years)		Remission group mean ± SD: 60.3 ± 13.5; Refractory/Relapsed mean ± SD: 58.1 ± 16.7; Mann-Whitney U test: U = 20.5, p = 1.000
FAB Classification	French-American-British morphology classification		M1=myeloblastic without maturation; M2=with maturation; M4=myelomonocytic; M5=monocytic
Specimen Groups	Classification of specimens based on response to VEN-based therapy	Remission, Refractory/Relapsed	Remission=diagnostic samples from patients who achieved CR/CRi; Refractory/relapsed=diagnostic samples from patients who failed to achieve CR/CRi (Refractory) or samples collected at first relapse after an initial response to VEN-based therapy(Relapsed).
Disease Stage At Specimen Collection	Disease context when sample obtained	De novo, Relapse	De novo=initial diagnosis; Relapse(DA)=post-DA regimen; Relapse(VEN)=post-VEN regimen
Prior Therapy	Treatment history before current VEN-based regimen		"-"=treatment-naive; "|"=sequential regimens
VEN-based Treatment Regimens	Venetoclax-containing treatment protocol		See Abbreviations for component definitions; "|"=regimen switch
VEN-induced CR/CRi Time	Days from VEN initiation to best response		Median: 38 days; range reflects heterogeneity
VEN-induced CR/CRi Duration	Days from response to relapse/change of regimen/last follow up		"-"=no CR/CRi achieved
First Post-treatment % Blasts in BM	Bone marrow blast percentage at first post-treatment assessment		Assessed at days 11-35; ND=not determined (sample inadequate)
First Post-treatment MRD Status (Flow)	MRD by multiparameter flow cytometry	Negative, Positive (with %)	Negative=<0.1%; Positive=≥0.1%; value=specific percentage
First Post-treatment Abnormal AML Fusions	Quantitative fusion gene transcript at response		ND=not detected/not done; value=transcript level by qPCR normalized by Internal control
Abnormal AML Fusions At Relapse	Fusion gene status at relapse		"-"=no relapse/no fusions; ND=not determined
% Blasts In BM At Relapse	Bone marrow blast percentage at relapse	Negative, Positive (with %)	"-"=no relapse or data unavailable
MRD Status (Flow) At Relapse	MRD status at relapse by flow cytometry		"-"=no relapse or data unavailable; ND=not determined
Subsequent Therapies Post-VEN	Treatments after VEN failure/discontinuation		Categorized by best available post-VEN strategy
Consensus AML Fusions	Standardized fusion gene classification		Per WHO 2022 classification
Karyotype	Cytogenetic analysis by G-banding	46,XX, 46,XY, with abnormalities	Described per ISCN nomenclature; \[n]=metaphases analyzed
Platelet Count (\*10^9/L)	Peripheral blood platelet count at collection		+1/-1 day at sample collection
WBC Count (\*10^9/L)	Peripheral blood white blood cell count at collection		+1/-1 day at sample collection
% Blasts In BM	Bone marrow blast percentage at specimen collection		BM smear sample analyzed by were reviewed by an experienced laboratory technologist per WHO 2022 criteria
% Blasts In PB	Peripheral blood blast percentage at specimen collection		PB smear sample analyzed by were reviewed by an experienced laboratory technologist per WHO 2023 criteria
LDH (U/L)	Serum lactate dehydrogenase		Elevated in high tumor burden
FLT3-ITD	Internal tandem duplication of FLT3 gene	Positive, Negative	Detected by NGS
CEBPA	CCAAT/enhancer-binding protein alpha mutation	Positive, Negative	Detected by NGS
NPM1	Nucleophosmin 1 mutation	Positive, Negative	Detected by NGS
RUNX1	Runt-related transcription factor 1 mutation	Positive, Negative	Detected by NGS
ASXL1	Additional sex combs like 1 mutation	Positive, Negative	Detected by NGS
TP53	Tumor protein p53 mutation	Positive, Negative	Detected by NGS
Variant Summary	Somatic mutations detected by targeted NGS		Genes separated by "|"; includes all pathogenic pathogenic variants (Tier I per AMP/ASCO/CAP 2017 guidelines). Variant nomenclature follows HGVS standards.
